# Supplementary material for: Amperometric hydrogen peroxide and glucose biosensor based on NiFe2/ordered mesoporous carbon nanocomposites
Source: Royal Society of Chemistry journal article supplement (doi:10.1039/c4an01549e), 2014-11-27
Supplement: c4an01549e1.pdf [file c4an01549e1.pdf]

## Supporting Information

### **Amperometric hydrogen peroxide and glucose biosensor based on the NiFe<sub>2</sub>/ordered mesoporous carbon nanocomposites**

Dong Xiang<sup>a,b,\*</sup>, Longwei Yin<sup>b,\*</sup>, Jingyun Ma<sup>b</sup>, Enyan Guo<sup>b</sup>, Qun Li<sup>b</sup>,

Zhaoqiang Li<sup>b</sup>, Kegao Liu<sup>a</sup>

<sup>a</sup> *School of Material Science and Engineering, Shandong Jianzhu University, Jinan 250101, P. R. China. E-mail: [xiang@sdjzu.edu.cn](mailto:xiang@sdjzu.edu.cn); Tel.: + 86 531 86367285.*

<sup>b</sup> *Key Laboratory of Liquid-Solid Structural Evolution and Processing of Materials, Ministry of Education, School of Materials Science and Engineering, Shandong University, Jinan 250061, P. R. China. E-mail: [yinlw@sdu.edu.cn](mailto:yinlw@sdu.edu.cn); Tel.: + 86 531 88396970; Fax: + 86 531 88396970.*

**Fig. S1**

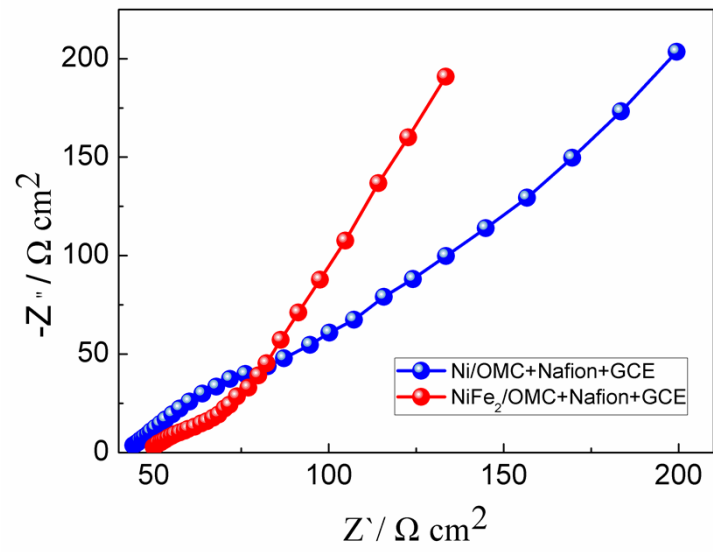

**Fig. S1** Nyquist diagram of electrochemical impedance spectroscopy in 0.1 M PBS (pH 7.0) containing 1.0 mM H<sub>2</sub>O<sub>2</sub> at Ni/OMC+Nafion+GCE and NiFe<sub>2</sub>/OMC+Nafion+GCE.

Fig. S2

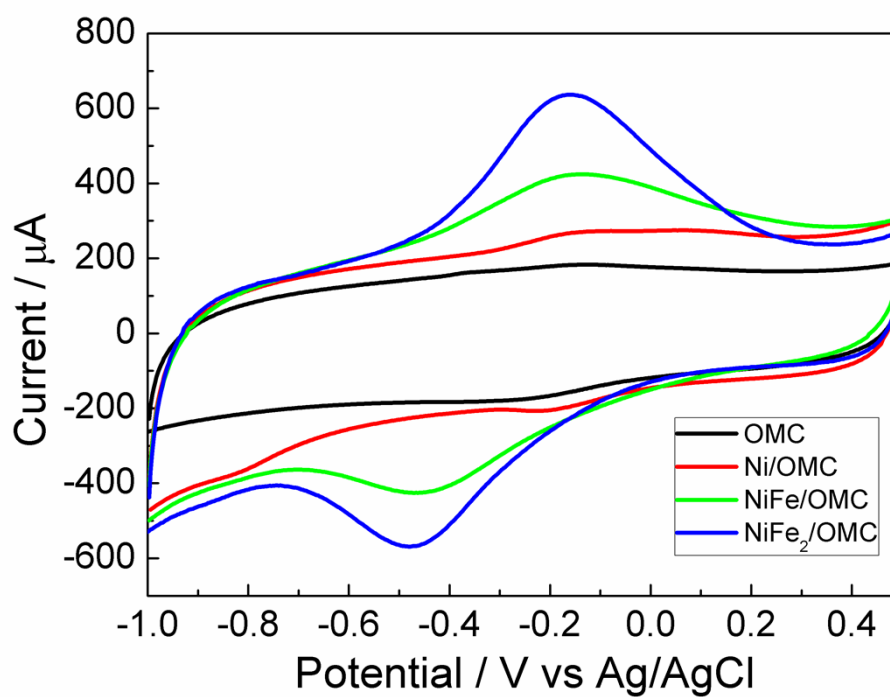

**Fig. S2** Cyclic voltammograms (CVs) of OMC+Nafion+GCE and NiFe<sub>x</sub>/OMC+Nafion+GCE ( $x=0, 1, 2$ ) of 1.0 mM H<sub>2</sub>O<sub>2</sub> in 0.1 M PBS, scan rate: 50 mV/ s.

Fig. S3

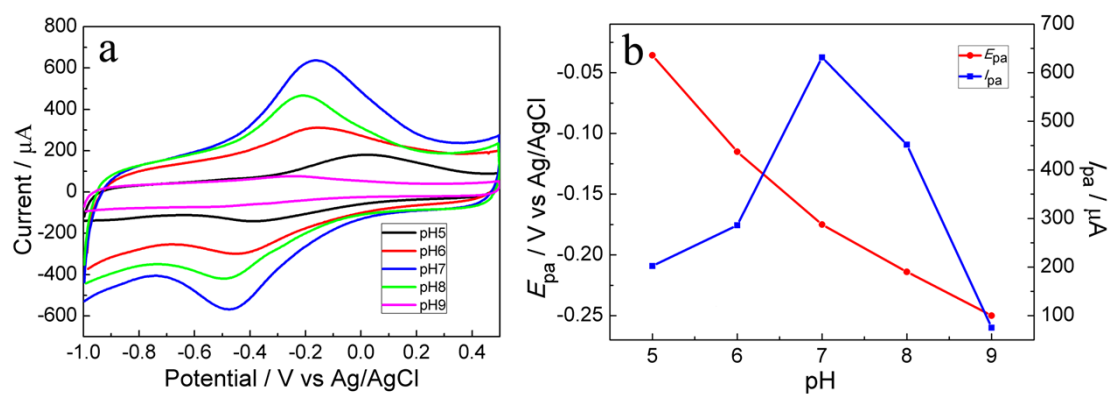

**Fig. S3** (a) Cyclic voltammograms (CVs) of NiFe<sub>2</sub>/OMC+Nafion+GCE of 1.0 mM H<sub>2</sub>O<sub>2</sub> in 0.1 M PBS at different pHs from 5 to 9, scan rate: 50 mV/s, (b) effects of solution pH on the  $E_{pa}$  (red rotundity) vs.  $I_{pa}$  (blue triangle).

**Fig. S4**

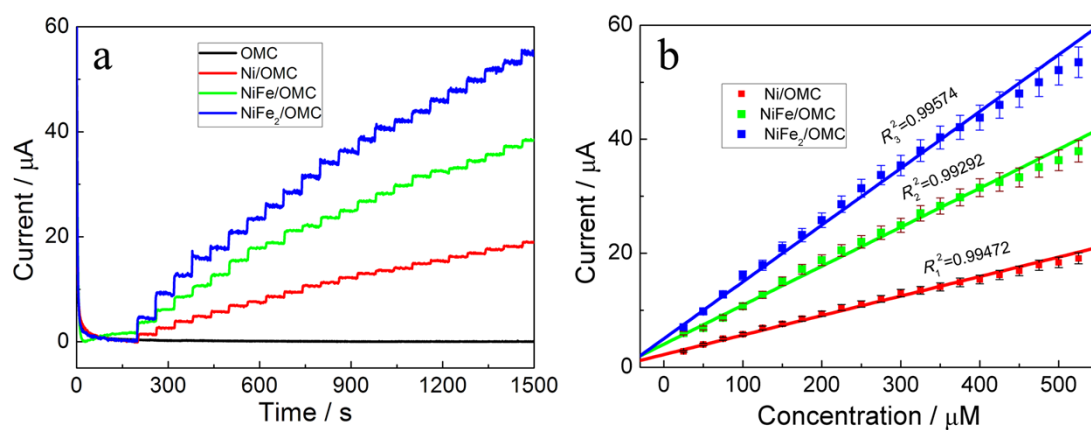

**Fig. S4** Dynamic response (current vs time,  $I-t$ ) of the biosensor to successive addition of 1 mM  $\text{H}_2\text{O}_2$  steps in the 0.1 M PBS (pH 7) solution at the applied potential of  $-0.2$  V in  $\text{N}_2$  saturated, rotation speed: 400 rpm, (a), the resulting data was processed and plotted as a scatter plot (current vs. concentration) with linear regression analysis (b) for the NiFe<sub>x</sub>/OMC electrodes.



**Fig. S6**

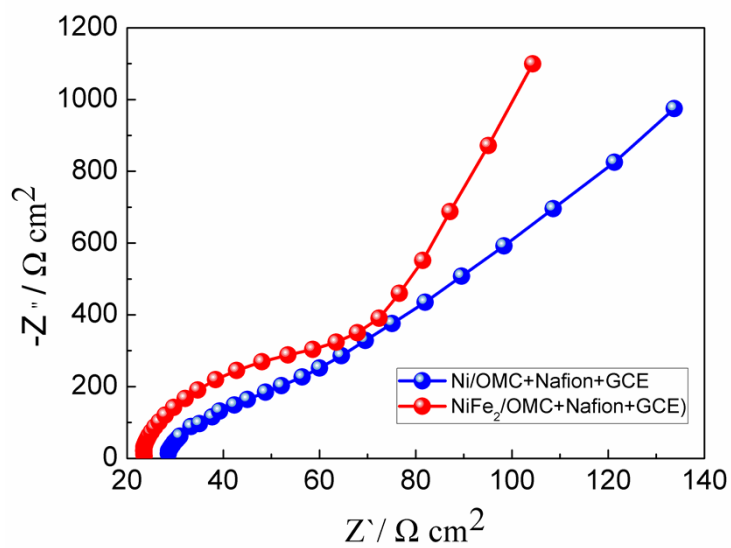

**Fig.S6** Nyquist diagram of electrochemical impedance spectroscopy in 0.1 M PBS (pH 6.5) containing 1.0 mM glucose at GOx+Ni/OMC+Nafion+GCE and GOx+NiFe<sub>2</sub>/OMC+Nafion+GCE.

**Fig. S7**

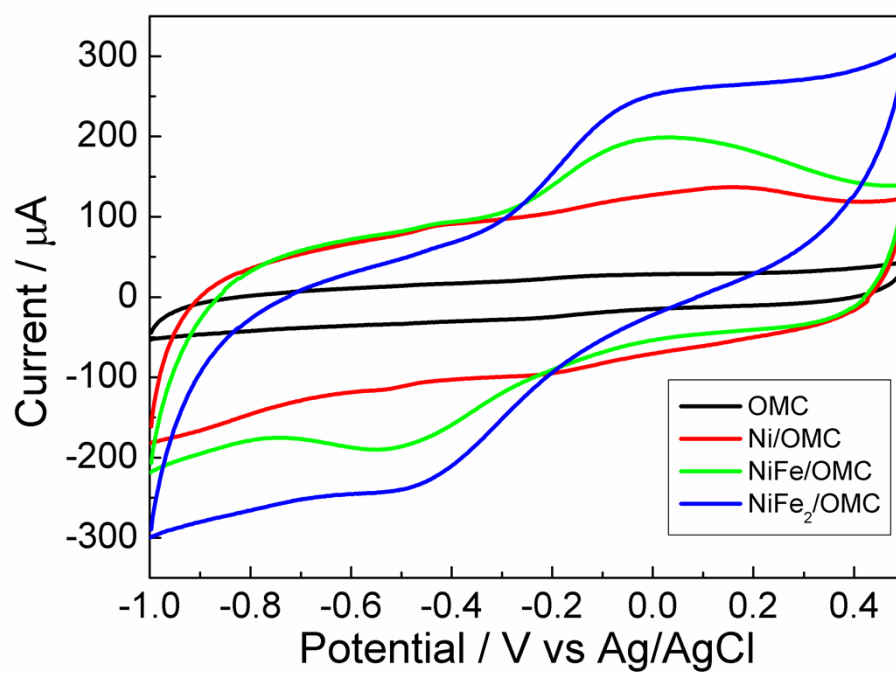

**Fig. S7.** Cyclic voltammograms (CVs) of GOx+ OMC+Nafion+GCE and GOx+NiFe<sub>x</sub>/OMC+Nafion+GCE ( $x=0, 1, 2$ ) of 1.0 mM glucose in 0.1 M PBS, scan rate: 50 mV/s.



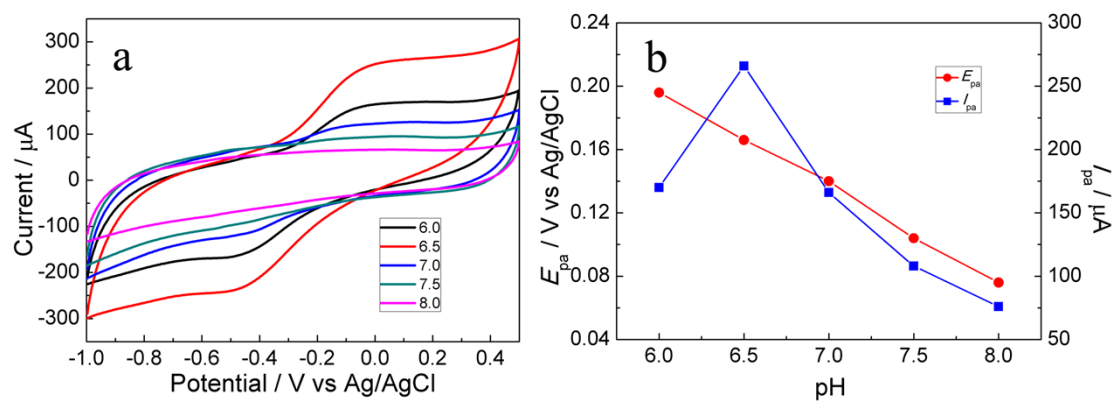

**Fig. S8** Cyclic voltammograms of GOx+NiFe<sub>2</sub>/OMC+Nafion+GCE of 0.5 mM glucose in 0.1 M PBS at different pHs from 6 to 8, scan rate: 50 mV/s, (b) effects of solution pH on the  $E_{pa}$  (red rotundity) vs  $I_{pa}$  (blue triangle).

**Fig. S9**

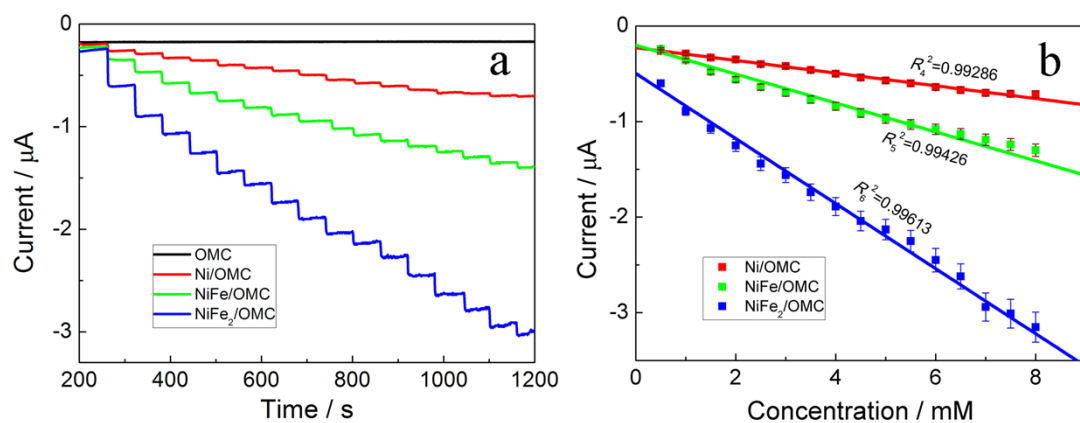

**Fig. S9** (a) Dynamic response of the GO<sub>x</sub>+NiFe<sub>x</sub>/OMC+Nafion+GCE sensor to successive injection of 0.5 mM glucose steps in the 0.1M PBS (pH 6.5) solution at the applied potential of -0.2 V in N<sub>2</sub> saturated, rotation speed: 400 rpm, (b) the resulting data was processed and plotted as a scatter plot (current vs concentration) with linear regression analysis.
